# Supplementary material
Source: PubMed Central journal article supplement (PMC8379765)
Supplement: 12889_2021_11606_MOESM1_ESM.pdf [file 12889_2021_11606_MOESM1_ESM.pdf]

**UC PromISE Study:**

**Educational Experiences and Wellbeing of University of California Undergraduate Students with Immigrant Parents**

**Spring 2020 Survey Instrument**

Q1 Do you consent to participate in this study?

Yes

No

Send to end of survey:  
If response to Q1 *Do you consent to participate in this study?* is *No*.

---

Q2 How old are you?

▼ under 18 ... 81 or more

Send to end of survey:  
If response to Q2 *How old are you?* is *Under 18*.

---

Q3 Are you currently enrolled as an undergraduate college student?

Yes

No

Send to end of survey:  
If response to Q3 *Are you currently enrolled as an undergraduate college student?* is *No*.

---

Q4 What campus are you currently enrolled at?

▼ UC Berkeley ... Other

Send to end of survey:  
If response to Q4 *What campus are you currently enrolled at?* is *Other*.

---

Q5 Do you have at least one immigrant parent?

Yes

No

Send to end of survey:  
If response to Q5 *Do you have at least one immigrant parent?* is *No*.

---

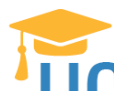

Q6 What country were you born in?

▼ Other (1) ... Zimbabwe (197)

Send to end of survey:  
If response to Q6 *What country were you born in?* is *United States of America*.

Q6\_TXT If you selected "other" above, please specify the country here.

---

Display Q7:  
If response to Q6 *What country where you born in?* is NOT *United States of America*.

Q7 What is your **current** immigration status?

- No current legal status (i.e. undocumented, non-DACA, expired visa, unauthorized)
- Deferred Action for Childhood Arrivals (DACA) recipient
- Temporary Protected Status (TPS) recipient
- Permanent resident/green card holder
- U.S. citizen (including naturalized citizen)
- Other (please specify) \_\_\_\_\_
- Valid visa holder (e.g. F1, J1, student visa)

Send to end of survey:  
If response to Q7 *What is your current immigration status?* is any of the following: *permanent resident, U.S. citizen, Valid visa holder*.

Display Q355:  
If response to Q6 *What country where you born in?* is *United States of America*.

Q355 Are one or more of your parents/guardians undocumented (e.g. no current legal status, DACA, TPS, expired visa, unauthorized)?

- No
- Yes
- I don't know

Send to end of survey when comparison group quota met for U.S. citizens with legal immigrant parents.  
If response to Q355 *What is your current immigration status?* is *No* or *I don't know*.

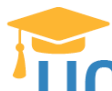

The first set of questions is about your personal background.

---

Q8 What is your gender?

- Female/Woman
  - Male/Man
  - Gender queer, gender non-conforming, non-binary gender
  - Prefer to self-describe \_\_\_\_\_
- 

Q9 What is your relationship status?

- Single, never married
  - Dating
  - Living together, not married
  - Married/domestic partner
  - Separated
  - Divorced
  - Widowed
  - Prefer to self-describe \_\_\_\_\_
- 

Q10 Do you have children?

- Yes
  - No
- 

Q11 What best describes your race or ethnicity? Check as many as apply.

- Asian
  - Black, African, or African American
  - Indigenous, or Native
  - Latina, Latino, Latinx, or Hispanic
  - Middle Eastern
  - Pacific Islander
  - White
  - Some other race or ethnicity (please specify): \_\_\_\_\_
- 

Display Q12:

If response to Q6 *What country where you born in?* is NOT *United States of America*.

Q12 How old were you when you first arrived to the United States?

▼ I don't know ... Over 30

---



Display Q13:  
If response to Q6 *What country where you born in?* is NOT *United States of America*.

Q13 Do you have any of the following? Check all that apply.

- AB-540, AB-2000, SB-68 – access to in-state college tuition rates
- California DREAM Act – access to financial aid
- Federally-issued work permit
- Pending application for legal immigration status (e.g. permanent legal residence/green card, U-visa, VAWA, refugee, asylee)
- Expired visa
- None of the above

The next set of questions is about your parents or guardians.

The questions allow you to identify up to two parents or guardians who were primarily responsible for raising you. For each parent/guardian, you will be asked to identify who you have in mind (e.g. mother, father, etc) and then you'll be asked questions about that parent/guardian specifically.

Q14 Think about one of the primary people who raised you. What is **Parent/Guardian 1's** relationship to you?

- Mother (biological or adoptive)
- Father (biological or adoptive)
- Stepmother
- Stepfather
- Other (please specify) \_\_\_\_\_

Q15 What country was Parent/Guardian 1 born in?

▼ Other (1) ... Zimbabwe (197)

Q15\_TXT If you selected "other" above, please specify the country here.

\_\_\_\_\_

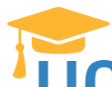

Q16 Is Parent/Guardian 1 a U.S. citizen, permanent resident, or have some other immigration status?

- No current legal status (i.e. undocumented, non-DACA, expired visa, unauthorized)
  - Deferred Action for Childhood Arrivals (DACA) recipient
  - Temporary Protected Status (TPS) recipient
  - Permanent resident/green card holder
  - U.S. citizen (including those with dual citizenship)
  - Does not live in the U.S.
  - Deceased
  - I don't know
  - Other (please specify) \_\_\_\_\_
- 

Q17 What category best describes the highest level of education Parent/Guardian 1 has completed?

- None
  - 6th grade or lower
  - 7th to 8th grade
  - 9th to 12th grade
  - High school diploma or GED
  - Some college (including vocational or technical program)
  - Bachelor's degree
  - Post-graduate degree (e.g. M.A., Ph.D., professional degree)
  - I don't know
  - Other (please specify): \_\_\_\_\_
- 

Q18 What category best describes Parent/Guardian 1's employment?

- Employee who works for wages or salary
  - Self-employed
  - Temporary/seasonal worker (e.g. seasonal agriculture, day labor)
  - Unemployed and looking for work
  - Not working (e.g. retired, stay-at-home parent, disabled)
  - I don't know
  - Other (please specify): \_\_\_\_\_
-

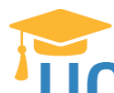

Q19 Do you have another parent, guardian, or primary caregiver who raised you?

- Yes  No

Skip To: Q25

If response to Q19 *Do you have another parent, guardian, or primary caregiver who raised you?* is *No*.

Q20 What is **Parent/Guardian 2's** relationship to you?

- Mother (biological or adoptive)  Stepfather  
 Father (biological or adoptive)  Other (please specify) \_\_\_\_\_  
 Stepmother

Q21 What country was Parent/Guardian 2 born in?

▼ Other (1) ... Zimbabwe (197)

Q21\_TXT If you selected "other" above, please specify the country here.

\_\_\_\_\_

Q22 Is Parent/Guardian 2 a U.S. citizen, permanent resident, or have some other immigration status?

- No current legal status (i.e. undocumented, non-DACA, expired visa, unauthorized)  
 Deferred Action for Childhood Arrivals (DACA) recipient  
 Temporary Protected Status (TPS) recipient  
 Permanent resident/green card holder  
 U.S. citizen (including those with dual citizenship)  
 Does not live in the U.S.  
 Deceased  
 I don't know  
 Other (please specify) \_\_\_\_\_



Q23 What category best describes the highest level of education Parent/Guardian 2 has completed?

- None
  - 6th grade or lower
  - 7th to 8th grade
  - 9th to 12th grade
  - High school diploma or GED
  - Some college (including vocational or technical program)
  - Bachelor's degree
  - Post-graduate degree (e.g. M.A., Ph.D., professional degree)
  - I don't know
  - Other (please specify): \_\_\_\_\_
- 

Q24 What category best describes Parent/Guardian 2's employment?

- Employee who works for wages or salary
  - Self-employed
  - Temporary/seasonal worker (e.g. seasonal agriculture, day labor)
  - Unemployed and looking for work
  - Not working (e.g. retired, stay-at-home parent, disabled)
  - I don't know
  - Other (please specify): \_\_\_\_\_
-

Q25 Please select the **current** immigration status of the other following groups of people.

*If you have multiple people in a group who have different statuses, please check multiple boxes. For example, if you have one sibling who has DACA and one who is a U.S. citizen, check both boxes.*

| Not Applicable (N/A) | No current legal status (undocumented, non-DACA, expired visa) | Deferred Action for Childhood Arrivals (DACA) | Temporary Protected Status (TPS) | Permanent resident/green card holder | U.S. citizen | Other immigration status | Does not live in the U.S. | I don't know |
|----------------------|----------------------------------------------------------------|-----------------------------------------------|----------------------------------|--------------------------------------|--------------|--------------------------|---------------------------|--------------|
|----------------------|----------------------------------------------------------------|-----------------------------------------------|----------------------------------|--------------------------------------|--------------|--------------------------|---------------------------|--------------|

Sibling(s)

Current romantic partner <sup>1</sup>

Children <sup>2</sup>

Extended family member(s) who **live in your permanent household** (e.g. grandparents, aunts, uncles, cousins, in-laws, etc)

Extended family member(s) who **do not live** in your permanent household

<sup>1</sup> Display this item:  
If response to Q9 *What is your relationship status?* is NOT *Single, never married*.

<sup>2</sup> Display this item:  
If response to Q10 *Do you have children?* is *Yes*.

Q25\_TXT If you would like to provide any clarifying information on the previous question, please do so here.

---

Q26 How often do you complete the following family responsibilities?

| Almost never or never | Once in a while | Sometimes | A lot of the time | Almost always or always |
|-----------------------|-----------------|-----------|-------------------|-------------------------|
|-----------------------|-----------------|-----------|-------------------|-------------------------|

Help family members pay the bills

Support family members with childcare, elder care, transportation, etc

Help manage the health of a family member

Do household chores

Provide emotional support to your family members



Q27 Thinking about your family's current economic situation, indicate how often you expect that your family will face the following circumstances **in the next three months**.

Almost never  
or never

Once in a  
while

Sometimes

A lot of the  
time

Almost always  
or always

---

Your family will experience bad times such as poor housing or not having enough food

Your family will have to do without the basic things that your family needs

---

**The next set of questions is about your household and living situation.**

---

Q28 Some students have multiple residences. The following question is about the place you consider your **permanent home**. This does not refer to temporary housing such as dorms, or short-term leases for housing near campus.

How many people, including yourself, currently live in your **permanent home**?

▼ 1 (1) ... I don't know (99)

---

Q29 What was your estimated total **household** income in 2019?

*This includes everyone who lives in your **permanent home**, including yourself, and helps pay for shared expenses.*

▼ \$0 (0) ... I don't know (99)

---

The following questions are about the place you live when school is in session. Please answer these questions based on your living situation before the COVID-19/coronavirus crisis occurred.

Q30 What best characterizes your current living situation while school is in session?

- Living at home with family
- On-campus housing
- Off-campus housing, not with family
- Other (please specify): \_\_\_\_\_

Q31 On a typical school day, how long does it take you to get to campus?

▼ Less than 15 minutes (1) ... I don't know (99)

The next set of questions is about detention and deportation.

*These questions may be triggering. You can skip these questions and proceed to the next section if desired.*

Q32 Please rate how frequently you think about the following people's deportation.

|                                           | Never | A few times a year | About once a month | About once a week | Daily |
|-------------------------------------------|-------|--------------------|--------------------|-------------------|-------|
| Your own deportation                      |       |                    |                    |                   |       |
| Your parent(s)/guardian(s) deportation    |       |                    |                    |                   |       |
| Your extended family members' deportation |       |                    |                    |                   |       |
| Your friends' deportation                 |       |                    |                    |                   |       |

Q33 Have you or any of your family or friends been in deportation proceedings, detained, or deported?

- Yes
- No
- I don't know
- Decline to state

Skip To: Q35

If response to Q33 *Have you or any of your family or friends been in deportation proceedings, detained, or deported?* is NOT Yes.

Q34 Please check off which of the following people have been involved with detention/deportation procedures since entering the United States.

If multiple people in the same category have experienced different procedures, check multiple boxes.

*For example, if you have a parent who is currently in deportation proceedings and another who was deported, check both of those boxes.*

If the same person had multiple types of interactions, check the most recent type of procedure.

*For example, if you had a sibling who was held in a detention center and then was deported, check "was deported" because that happened most recently.*

|                                                                                                                                 | Not Applicable (N/A) | In deportation proceedings | Held in a detention center | Was deported | Other type of detention/deportation procedure |
|---------------------------------------------------------------------------------------------------------------------------------|----------------------|----------------------------|----------------------------|--------------|-----------------------------------------------|
| Yourself                                                                                                                        |                      |                            |                            |              |                                               |
| Parent(s)/guardian(s)                                                                                                           |                      |                            |                            |              |                                               |
| Sibling(s)                                                                                                                      |                      |                            |                            |              |                                               |
| Romantic partner(s)                                                                                                             |                      |                            |                            |              |                                               |
| Children <sup>1</sup>                                                                                                           |                      |                            |                            |              |                                               |
| Extended family member(s) who <u>live in your permanent household</u> (e.g. grandparents, aunts, uncles, cousins, in-laws, etc) |                      |                            |                            |              |                                               |
| Extended family member(s) who <u>do not live</u> in your permanent household                                                    |                      |                            |                            |              |                                               |
| Friend(s)                                                                                                                       |                      |                            |                            |              |                                               |

<sup>1</sup> Display this item:  
If response to Q10 *Do you have children?* is Yes.

Q34\_TXT If you would like to provide any clarifying information on the previous question, please do so here.

---

The next set of questions is about your personal finances and work. We define work broadly to include formal and informal employment as well as participating in an internship or fellowship program for which you receive a stipend or scholarship.

If the COVID-19/coronavirus crisis changed your work situation, please answer these questions based on your work situation before the crisis occurred.

-----  
Q35 Are you currently working for some type of financial compensation?

- Yes
- No
- I don't know
- Decline to state

Skip To: Q38  
If response to Q35 *Are you currently working for some type of financial compensation?* is *No*.

-----  
Q36 About how many hours do you spend working in a typical week (7 days)?  
*If you work multiple jobs, include all hours worked among all jobs.*

- 0 hours
- 1 to 5 hours
- 6 to 10 hours
- 11 to 15 hours
- 16 to 20 hours
- 21 to 25 hours
- 26 to 30 hours
- 31 to 35 hours
- 36 to 40 hours
- 41 to 45 hours
- 46 to 50 hours
- More than 50 hours
- Other
- I don't know

-----  
Q37 What is your hourly pay rate?  
*If you work multiple jobs, provide the rate for the job where you work the most hours.*

\_\_\_\_\_

-----  
Q38 Please rate the extent to which you agree or disagree with the following statements.

|                      |          |                                  |       |                   |
|----------------------|----------|----------------------------------|-------|-------------------|
| Strongly<br>disagree | Disagree | Neither<br>agree nor<br>disagree | Agree | Strongly<br>agree |
|----------------------|----------|----------------------------------|-------|-------------------|

-----  
I worry that I will have to take time off from school to save money to pay for school.

I am concerned that I will not be able to finance my college education.

-----

Q39 Indicate how often you have experienced the following since starting school this year.

|                             |                 |           |                      |                                  |
|-----------------------------|-----------------|-----------|----------------------|----------------------------------|
| Almost<br>never or<br>never | Once in a while | Sometimes | A lot of the<br>time | Almost<br>always<br>or<br>always |
|-----------------------------|-----------------|-----------|----------------------|----------------------------------|

---

Worried about not having enough money to pay for things

Had difficulty paying your bills

Had to go without the basic things that you need

Had to go without the materials needed for your studies (e.g. books, laptop, iclicker, art/lab supplies)

-----

Q40 These statements are about general feelings you have about yourself in relation to others. Please indicate the extent to which you agree or disagree with each statement.

|                      |          |                      |                   |       |                   |
|----------------------|----------|----------------------|-------------------|-------|-------------------|
| Strongly<br>disagree | Disagree | Disagree<br>somewhat | Agree<br>somewhat | Agree | Strongly<br>agree |
|----------------------|----------|----------------------|-------------------|-------|-------------------|

---

Deep down, I believe that I am as worthy as others.

I deserve to be treated the same as other people are treated.

I am as worthy as others of getting my needs met.

Everyone is worthy of having their needs met.

I feel as though I matter in the world.

I matter to the people in my community (however you define your community).

Thinking about the country as a whole, I don't matter as much as everyone else.

Please choose "strongly agree" for this question.

I deserve to be respected in my community.

I think I'm worthy of equal access to societal resources (e.g. healthcare, education, public safety).

-----

**The next set of questions is about current immigration policy.**

-----

Q41 How frequently do you check for updates about immigration policy?

- |                              |                                 |
|------------------------------|---------------------------------|
| <input type="radio"/> Never  | <input type="radio"/> Sometimes |
| <input type="radio"/> Rarely | <input type="radio"/> Often     |



Q42\_1 In general, do you think that the **United States government** tries to make immigrants feel:

- Very unwelcome
  - Somewhat unwelcome
  - Somewhat welcome
  - Very welcome
- 

Q42\_2 In general, do you think that the **California government** tries to make immigrants feel:

- Very unwelcome
  - Somewhat unwelcome
  - Somewhat welcome
  - Very welcome
- 

Q42\_3 In general, do you think that **your local government** tries to make immigrants feel:

- Very unwelcome
  - Somewhat unwelcome
  - Somewhat welcome
  - Very welcome
- 

**The next set of questions are about your experiences and feelings about current immigration policy. Please indicate how frequently you have felt the following way in your day to day interactions.**

***These questions may be triggering. You can skip these questions and proceed to the next section if desired.***

---

Q43\_1 Do you feel that you have no liberty and need to stay home because of current immigration policy?

- Never
  - Rarely
  - Sometimes
  - Often
  - Always
- 

Q43\_2 Have you been treated unfairly at a restaurant or store because of current immigration policy?

- Never
  - Rarely
  - Sometimes
  - Often
  - Always
-



Q43\_3 Have you been silenced by others or felt that your opinion did not matter because of current immigration policy?

- Never
  - Rarely
  - Sometimes
  - Often
  - Always
- 

Q43\_4 Do others act like they have the right to treat you unfairly or poorly because of current immigration policy?

- Never
  - Rarely
  - Sometimes
  - Often
  - Always
- 

Q43\_5 Do you avoid certain locations like parks and neighborhoods because you do not feel safe given current immigration policy?

- Never
  - Rarely
  - Sometimes
  - Often
  - Always
- 

Q43\_6 Do you fear being deported or detained?

- Never
  - Rarely
  - Sometimes
  - Often
  - Always
- 

Q43\_7 Have you ever been treated like a criminal because of current immigration policy?

- Never
  - Rarely
  - Sometimes
  - Often
  - Always
-

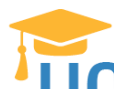

Q43\_8 Were you treated poorly because of your English language skills and/or accent given current immigration policy?

- Never
  - Rarely
  - Sometimes
  - Often
  - Always
- 

Q43\_9 Do other members of your ethnic group treat you poorly because of current immigration policy?

- Never
  - Rarely
  - Sometimes
  - Often
  - Always
- 

Q43\_10 Do you feel ignored when seeking help because of current immigration policy?

- Never
  - Rarely
  - Sometimes
  - Often
  - Always
- 

Q43\_11 Do you feel unsafe when leaving your home because of current immigration policy?

- Never
  - Rarely
  - Sometimes
  - Often
  - Always
- 

Q43\_12 Do you feel that that you have no rights because of current immigration policy?

- Never
  - Rarely
  - Sometimes
  - Often
  - Always
- 

Q43\_13 Have you been humiliated because of who you are given current immigration policy?

- Never
- Rarely
- Sometimes
- Often
- Always





Q43\_14 Do you feel that you have been exploited or taken advantage of at work because of current immigration policy?

- Never
  - Rarely
  - Sometimes
  - Often
  - Always
- 

Q43\_15 Do you worry about the impact immigration policies have on you or your family?

- Never
  - Rarely
  - Sometimes
  - Often
  - Always
- 

Q43\_16 Do you fear that you or a family member will be reported to immigration officials?

- Never
  - Rarely
  - Sometimes
  - Often
  - Always
- 

Q43\_17 Do you worry about family separation due to deportation?

- Never
  - Rarely
  - Sometimes
  - Often
  - Always
-

Q44 There are many ways to try to deal with problems. These items deal with ways you've been **coping with the stress in your life related to current immigration policies**.

We want to know to what extent you've been doing what the item says. How much or how frequently. Don't answer on the basis of whether it seems to be working or not - just whether or not you're doing it.

We recognize that the COVID-19/coronavirus crisis has also created stress that you have to cope with. Do not think about coping with this type of stress when answering these questions.

I haven't been  
doing this at all

I've been doing  
this a little bit

I've been doing  
this a medium  
amount

I've been doing  
this a lot

---

I've been turning to work or other activities to take my mind off things

I've been concentrating my efforts on doing something about the situation I'm in.

I've been saying to myself "this isn't real."

I've been using alcohol or other drugs to make myself feel better.

I've been getting emotional support from others.

I've been giving up trying to deal with it.

I've been taking action to try to make the situation better.

I've been refusing to believe that it has happened.

I've been saying things to let my unpleasant feelings escape.

I've been getting help and advice from other people.

I've been using alcohol or other drugs to help me get through it.

I've been trying to see it in a different light, to make it seem more positive.

I've been criticizing myself.

I've been trying to come up with a strategy about what to do.

I've been getting comfort and understanding from someone.

I've been giving up the attempt to cope.

I've been looking for something good in what is happening.

I've been making jokes about it.

I've been doing something to think about it less, such as going to the movies, watching TV, reading, daydreaming, sleeping, or shopping.

Please choose "I've been doing this a lot" for this question.

I've been accepting the reality of the fact that it has happened.

I've been expressing my negative feelings.

- I've been trying to find comfort in my religion or spiritual beliefs.
- I've been trying to get advice or help from other people about what to do.
- I've been learning to live with it.
- I've been thinking hard about what steps to take.
- I've been blaming myself for things that happened.
- I've been praying or meditating.
- I've been making fun of the situation.

**The next set of questions is about your conversations with others about the current immigration policy context.**

Q45 Please indicate how often you engage in the following actions.

|                                                                                                                                             | Never | Rarely | Sometimes | Often | Almost all the time |
|---------------------------------------------------------------------------------------------------------------------------------------------|-------|--------|-----------|-------|---------------------|
| Talked with others about <i>immigration or immigration policy</i> .                                                                         |       |        |           |       |                     |
| Talked with others about the <i>challenges faced by immigrants</i> .                                                                        |       |        |           |       |                     |
| <i>Spoken up</i> when you have heard people make <i>false statements about immigrants</i> (e.g., immigrants are lazy and live off welfare). |       |        |           |       |                     |
| Encouraged <i>others to speak up</i> when they hear people make false statements about immigrants.                                          |       |        |           |       |                     |
| <i>Talked with someone about overhearing others</i> make demeaning comments about immigrants.                                               |       |        |           |       |                     |
| <i>Confronted</i> someone because you heard them use the word “illegal” or other derogatory terms for immigrants.                           |       |        |           |       |                     |
| <i>Wanted to change the subject</i> when you have heard people talking about immigrants in a demeaning way.                                 |       |        |           |       |                     |
| Talked with others about what immigration policy <i>means for immigrants</i> .                                                              |       |        |           |       |                     |



The next set of questions is about your political engagement.

Display Q46:

If response to Q6 *What country where you born in?* is *United States of America.*

Q46 We know that most people don't vote in all elections. Usually between one-quarter to one-half of those eligible actually come out to vote. How often do you vote in local and national elections?

- Never
- Rarely
- Sometimes
- Often
- Always
- I don't know

Q47 Do you talk to people and try to show them why they should vote for or against one of the parties or candidates?

- Never
- Rarely
- Sometimes
- Often
- Always
- I don't know

Q48 Below is a list of things that some people do to express their views. For each one, identify how often you do it.

|       |        |           |       |              |
|-------|--------|-----------|-------|--------------|
| Never | Rarely | Sometimes | Often | I don't know |
|-------|--------|-----------|-------|--------------|

- Contact a public official - at any level of government - to express your opinion
- Take part in a protest, march, or demonstration, or rally **on-campus**
- Take part in a protest, march, or demonstration, or rally **off-campus**
- Sign a petition regarding an issue or problem that concerns you
- Boycott a company or product for social or political reasons
- Buy a certain product or service because you like the social or political values of the company
- Discuss political issues on social media
- Wear buttons or display stickers with social or political messages
- Expressed a political point of view during a class discussion

The second portion of the survey focuses on mental health and wellbeing.

This next set of questions is about your use of mental health services.

All of your answers are confidential.

-----  
Q49 Have you **ever sought help** of any kind for your mental or emotional health?

- Yes
- No
- I don't know
- Decline to state

Skip To: Q52

If response to Q49 *Have you ever sought help of any kind for your mental or emotional health?* is NOT Yes.

-----  
Q50 Who have you sought help from for your mental or emotional health? Check as many as apply.

- On-campus professional therapist
- Off-campus professional therapist
- Professor
- Professional staff member
- Friend
- Family member
- Religious or spiritual leader
- Other (please specify) \_\_\_\_\_
- Decline to state

-----  
Display Q51:

If response to Q50 *Who have you sought help from for your mental or emotional health?* included the selection of one or more of the following items: *On-campus professional therapist, Off-campus professional therapist, Other.*

Q51 Have you ever participated in therapy for three or more sessions?

- Yes
- No
- Decline to state

-----  
Q52 Was there ever a time during **this academic year** when you **felt that you might need to see a professional** because of problems with your mental health, emotions, or nerves?

- Yes
  - No
  - I don't know
  - Decline to state
-

Q53 The next set of questions ask you about your feelings and thoughts during the **last 7 days**. Please indicate how often you felt or thought a certain way.

Please answer this question with regard to what was typical, before the COVID-19/coronavirus crisis occurred.

Never                      Almost never                      Sometimes                      Often                      Almost Always

---

Been upset because of something that happened unexpectedly

Felt that you were unable to control the important things in your life

Felt nervous and "stressed"

Felt confident about being able to handle your personal problems

Felt that things were going your way

Found that you could not cope with all the things that you had to do

Been able to control irritations in your life

Felt that you were on top of things

Been angered because of things that happened that were outside of your control

Felt that your difficulties were piling so high that you could not overcome them

---

**The next set of questions is about your health.**

---

Q54 Would you say that in general your health is excellent, very good, good, fair, or poor?

- Poor
  - Fair
  - Good
  - Very good
  - Excellent
-

Q55 What is your **primary** source of health insurance?

- I have a university Student Health Insurance Plan
- I have MediCal
- I am covered by my parent/guardian's plan
- I am covered by my employer-based plan (or my spouse/partner's employer-based plan)
- I bought a plan on my own
- I have health insurance, but I do not know the primary source
- I do not have health insurance
- I do not know if I have health insurance
- Other (please specify) \_\_\_\_\_

-----

**The next set of questions is about your psychological state.**

**Please answer these questions with regard to what was typical, before the COVID-19/coronavirus crisis occurred.**

***These questions may be triggering. You can skip these questions and proceed to the next section if desired.***

-----

Q56 Over the **last two weeks**, how often have you been bothered by any of the following problems?

|                                                                                                                                                                          | Not at all | Several days | More than half the days | Nearly every day |
|--------------------------------------------------------------------------------------------------------------------------------------------------------------------------|------------|--------------|-------------------------|------------------|
| Little interest or pleasure in doing things                                                                                                                              |            |              |                         |                  |
| Feeling down, depressed, or hopeless                                                                                                                                     |            |              |                         |                  |
| Trouble falling or staying asleep, or sleeping too much                                                                                                                  |            |              |                         |                  |
| Feeling tired or having little energy                                                                                                                                    |            |              |                         |                  |
| Poor appetite or overeating                                                                                                                                              |            |              |                         |                  |
| Feeling bad about yourself - or that you're a failure or have let yourself or your family down                                                                           |            |              |                         |                  |
| Trouble concentrating on things, such as reading the newspaper or watching television                                                                                    |            |              |                         |                  |
| Moving or speaking so slowly that other people could have noticed. Or the opposite - being so fidgety or restless that you have been moving around a lot more than usual |            |              |                         |                  |
| Thoughts that you would be better off dead, or hurting yourself in some way                                                                                              |            |              |                         |                  |

-----



Q57 Over the **last two weeks**, how often have you been bothered by the following problems?

Not at all

Several days

More than half the days

Nearly every day

Feeling nervous, anxious, or on edge

Not being able to stop or control worrying

Worrying too much about different things

Trouble relaxing

Being so restless that it is hard to sit still

Becoming easily annoyed or irritable

Feeling afraid, as if something awful might happen

**The next set of questions is about the food you have eaten since the beginning of this academic year.**

Q58 Please identify whether the following statements are often true, sometimes true, or never true since the beginning of this academic year.

Never true

Sometimes true

Often true

I don't know

The food I bought just didn't last, and I didn't have money to get more.

I couldn't afford to eat balanced meals.

Q58\_3 Since the beginning of this academic year, did you ever **cut the size of your meals** or **skip meals** because there wasn't enough money for food?

Yes, almost every month

Yes, only 1 or 2 months

Yes, some months but not every month

No

I don't know

Q58\_4 Since the beginning of this academic year, did you ever **eat less** than you felt you should because there wasn't enough money for food?

Yes

I don't know

No

Q58\_5 Since the beginning of this academic year, were you ever **hungry but didn't eat** because there wasn't enough money for food?

Yes

I don't know

No







Q62 What year are you?

- First year undergraduate (e.g. freshman)
  - Second year undergraduate (e.g. sophomore)
  - Third year undergraduate (e.g. junior)
  - Fourth year undergraduate (e.g. senior)
  - Fifth year or more undergraduate
  - Other (please specify) \_\_\_\_\_
  - I don't know
- 

Q63 In what area is your primary major?

- |                                                       |                                                     |
|-------------------------------------------------------|-----------------------------------------------------|
| <input type="radio"/> Art                             | <input type="radio"/> Interdisciplinary             |
| <input type="radio"/> Biological and life sciences    | <input type="radio"/> Math and computer science     |
| <input type="radio"/> Business                        | <input type="radio"/> Physical science              |
| <input type="radio"/> Education                       | <input type="radio"/> Public and social service     |
| <input type="radio"/> Engineering                     | <input type="radio"/> Social science                |
| <input type="radio"/> Medicine and health professions | <input type="radio"/> Undecided/undeclared          |
| <input type="radio"/> Humanities                      | <input type="radio"/> Other (please specify): _____ |

Q64 Since you started at {CAMPUS}, have you taken any quarters/semesters off (excluding summer or other intersessions)?

- No, never
  - Yes, 1 quarter/semester
  - Yes, more than 1 quarter/semester
  - I don't know
- 

**The next set of questions is about your academic performance.**

---

Q65 What is your **overall** GPA at {CAMPUS}?

- |                                 |                                 |                                    |
|---------------------------------|---------------------------------|------------------------------------|
| <input type="radio"/> 0.00-0.24 | <input type="radio"/> 1.50-1.74 | <input type="radio"/> 3.00-3.24    |
| <input type="radio"/> 0.25-0.49 | <input type="radio"/> 1.75-1.99 | <input type="radio"/> 3.25-3.49    |
| <input type="radio"/> 0.50-0.74 | <input type="radio"/> 2.00-2.24 | <input type="radio"/> 3.50-3.74    |
| <input type="radio"/> 0.75-0.99 | <input type="radio"/> 2.25-2.49 | <input type="radio"/> 3.75-3.99    |
| <input type="radio"/> 1.00-1.24 | <input type="radio"/> 2.50-2.74 | <input type="radio"/> 4.0          |
| <input type="radio"/> 1.25-1.49 | <input type="radio"/> 2.75-2.99 | <input type="radio"/> I don't know |



Q66 Have you ever failed a course at {CAMPUS}?

- Yes  I don't know  
 No

Q67 Have you ever earned a place on the Dean's List or Honor Roll at {CAMPUS}?

- Yes  I don't know  
 No

Q68 How many units are you currently enrolled in?

*Most classes are 3-4 units. Students must be enrolled in 12 units to be considered full-time and eligible for financial aid.*

▼ 0 ... I don't know

**The next set of questions is about immigration policy's impact on your educational experiences.**

Display Q69:

If response to Q6 What country where you born in? is NOT United States of America.

Q69 How frequently have the following occurred during **this academic year** because you were dealing with or thinking about an issue related to **your immigration status?**

| Never | A few times a year | About once a month | About once a week | Daily |
|-------|--------------------|--------------------|-------------------|-------|
|-------|--------------------|--------------------|-------------------|-------|

Missed class

Was distracted in class

Lost needed study hours

Did poorly on an exam



Q70 How frequently have the following occurred during **this academic year** because you were dealing with or thinking about an issue related to **your family members' immigration status**?

Never      A few times a year      About once a month      About once a week      Daily

- Missed class
- Was distracted in class
- Lost needed study hours
- Did poorly on an exam

Q71 How frequently during **this academic year** have you done each of the following?

Please answer this question with regard to what was typical, before the COVID-19/coronavirus crisis occurred.

Never      Rarely      Sometimes      Often      N/A (Not Applicable)

- Failed to turn in a course assignment
- Gone to class unprepared
- Skipped class
- Sought academic help from instructor or tutor when needed
- Studied with a group of classmates outside of class
- Contributed to a class discussion
- Please choose "often" for this question.
- Communicated with the instructor outside of class about issues and concepts derived from a course

Q72 Please rate the extent to which you agree or disagree with the following statements.

Strongly disagree      Disagree      Neither agree nor disagree      Agree      Strongly agree

- Thinking about life after graduation gives me anxiety.
- I feel prepared to achieve my career goals.
- I worry about whether I will be able to use my degree after graduation.



The next set of questions is about your extracurricular experiences.

Display Q73:

If response to Q6 *What country where you born in?* is NOT *United States of America*.

Q73 Please rate the extent to which you agree or disagree with the following statements.

Strongly  
disagree

Disagree

Neither agree  
nor disagree

Agree

Strongly agree

My immigration status has prevented me from taking advantage of career preparation opportunities.

I can pursue my desired career regardless of my immigration status.

Q74 Below are various opportunities that college students may take part in. Check all that you have participated in while at {CAMPUS}?

- Unpaid internship
- Paid internship
- Credit-based internship, practicum, or field experience
- Member of an **on-campus** organization
- Member of an **off-campus** organization
- Held a career-relevant job
- Research experience (not as a research subject)
- Graduate school preparation program
- Study abroad
- Campus exchange program (such as UCDC)
- Other (please specify): \_\_\_\_\_
- None of the above

Q75 Have you ever participated in **any organization** that tried to **solve a problem** at your school, in the community, or in the broader society?

- Yes, I have done it this academic year
- Yes, I have done it in the past but not this academic year
- No, I have not done it
- I don't know



Display Q76:

If response to Q75 *Have you ever participated in any organization ...* is one of the following: *Yes, I have done it this academic year*, or *Yes, I have done it in the past but not this academic year*.

Q76 Have you ever been you in a **leadership position in an organization that tried to solve a problem** at your school, in the community, or in the broader society while enrolled at {CAMPUS}?

- Yes, I have done it this academic year
- Yes, I have done it in the past but not this academic year
- No, I have not done it
- I don't know

Display Q77:

If response to Q75 *Have you ever participated in any organization ...* is *Yes, I have done it this academic year*.

Q77 How often do you **participate in organizational activities** that try to **solve a problem** at your school, the community, or broader society?

- Never
- Rarely
- Sometimes
- Often

Q78 Have you ever spent time participating in any community service or volunteer activity?

*A volunteer activity means working in some way to help others for no pay.*

- Yes, I have done it this academic year
- Yes, I have done it in the past but not this academic year
- No, I have not done it
- I don't know

The next set of questions is about how you feel on and around your university campus.

---

Q79 Please rate the extent to which you agree or disagree with the following statements.

|                                                                                        | Strongly disagree | Disagree | Neither agree nor disagree | Agree | Strongly agree |
|----------------------------------------------------------------------------------------|-------------------|----------|----------------------------|-------|----------------|
| <hr/>                                                                                  |                   |          |                            |       |                |
| I feel a sense of belonging to this university.                                        |                   |          |                            |       |                |
| I see myself as part of the university community.                                      |                   |          |                            |       |                |
| I am enthusiastic about this university.                                               |                   |          |                            |       |                |
| I can present my whole, authentic self on campus without worrying about repercussions. |                   |          |                            |       |                |

---

Q80 How often have you heard or witnessed the following groups express **positive feelings** about undocumented immigrant communities?

|                                               | Never | Rarely | Sometimes | Often |
|-----------------------------------------------|-------|--------|-----------|-------|
| <hr/>                                         |       |        |           |       |
| Faculty                                       |       |        |           |       |
| Staff                                         |       |        |           |       |
| Students                                      |       |        |           |       |
| Members of the community surrounding {CAMPUS} |       |        |           |       |

---

Q81 How often have you heard or witnessed the following groups express **negative feelings** about undocumented immigrant communities?

|                                               | Never | Rarely | Sometimes | Often |
|-----------------------------------------------|-------|--------|-----------|-------|
| <hr/>                                         |       |        |           |       |
| Faculty                                       |       |        |           |       |
| Staff                                         |       |        |           |       |
| Students                                      |       |        |           |       |
| Members of the community surrounding {CAMPUS} |       |        |           |       |

---



Display Q82:  
If response to Q6 *What country where you born in?* is NOT *United States of America*.

Q82 During **this academic year**, have you experienced the following:

No, never                      Yes, 1-3 times                      Yes, more than 3 times

Been denied access to a campus resource or program because of your immigration status

Had to educate a university staff person about your eligibility to receive a service or resource

Been given inaccurate or incorrect information about how to complete a university procedure (ie. enrollment, filling a form) because the staff person didn't know the correct procedures for someone with your immigration status

Display Q83:  
If response to Q6 *What country where you born in?* is NOT *United States of America*.

Q83 Please rate the extent to which you agree or disagree with the following statements

Strongly disagree                      Disagree                      Neither agree nor disagree                      Agree                      Strongly agree

It takes a lot of time to get an answer about something related to being an undocumented student.

It is stressful to get an answer about something related to being an undocumented student.

My immigration status prevents me from accessing the resources I need on campus.



The next set of questions is about campus resources.

Q84 Please identify how frequently you have visited the following offices or services at {CAMPUS} during **this academic year**?

Please answer this question with regard to what was typical, before the COVID-19/coronavirus crisis occurred.

|                                                                                 | Never | A few times a year | About once a month | About once a week | More than once a week | I don't think this exists on my campus |
|---------------------------------------------------------------------------------|-------|--------------------|--------------------|-------------------|-----------------------|----------------------------------------|
| Academic counselor                                                              |       |                    |                    |                   |                       |                                        |
| Academic support services (e.g. writing center, EOP, tutoring center)           |       |                    |                    |                   |                       |                                        |
| Peer tutoring                                                                   |       |                    |                    |                   |                       |                                        |
| Career center                                                                   |       |                    |                    |                   |                       |                                        |
| Identity-based center (e.g. women's center, LGBTQ center; multicultural center) |       |                    |                    |                   |                       |                                        |
| Basic needs/food pantry                                                         |       |                    |                    |                   |                       |                                        |
| Immigration-related legal services                                              |       |                    |                    |                   |                       |                                        |
| Student health center                                                           |       |                    |                    |                   |                       |                                        |
| Mental health counseling center                                                 |       |                    |                    |                   |                       |                                        |

Q91 Given the changes due to COVID-19/coronavirus, are you using campus services more, less, or about the same?

- A lot less
- Somewhat less
- About the same
- Somewhat more
- A lot more

Q85 Have you ever been to an office or met with a staff person at {CAMPUS} who focuses on supporting undocumented students and/or students with undocumented family members?

- Yes
- No
- I don't know
- Decline to state

Display this introduction:  
 If response to Q85 *Have you ever been to an office or met with a staff person at ...* is *Yes, I don't know, or Decline to state.*

**The following questions ask about your interactions with offices or staff at {CAMPUS} who focus on supporting undocumented students and/or students with undocumented family members. These offices have different names, such as Dream Centers or Undocumented Student Programs.**

**Please answer this question with regard to what was typical, before the COVID-19/coronavirus crisis occurred.**

Display Q86:  
 If response to Q85 *Have you ever been to an office or met with a staff person at ...* is *Yes, I don't know, or Decline to state.*

Q86 Please identify how frequently you have done the following **this academic year?**

| Never | A few times<br>a year | About once<br>a month | About once<br>a week | More than<br>once a<br>week | I don't think<br>this exists<br>on my<br>campus |
|-------|-----------------------|-----------------------|----------------------|-----------------------------|-------------------------------------------------|
|-------|-----------------------|-----------------------|----------------------|-----------------------------|-------------------------------------------------|

---

Visited the undocumented student program office/center

Spoke with a professional staff member from the undocumented student program office/center

Spoke with a student staff member from the undocumented student program office/center

Spoke with a campus partner (e.g. academic counselor, mental health counselor) at the undocumented student program office/center

Spoke with an immigration lawyer or legal service provider who was provided by your campus or university system

---



Display Q87:  
If response to Q85 *Have you ever been to an office or met with a staff person at ...* is *Yes, I don't know, or Decline to state.*

Q87 Undocumented student programs often organize their own events aimed at supporting undocumented communities. Have you attended any of the following types of events offered by undocumented student programs **this academic year**?

|                                                                                                                                               | No, 0 events | Yes, 1 event | Yes, more than 1 event | I don't think this exists on my campus |
|-----------------------------------------------------------------------------------------------------------------------------------------------|--------------|--------------|------------------------|----------------------------------------|
| Academic event                                                                                                                                |              |              |                        |                                        |
| Finance-related event (e.g. CA Dream Act workshop, scholarship session, financial wellness workshop)                                          |              |              |                        |                                        |
| Immigration law-related event (e.g. Know Your Rights workshop, DACA renewal clinic; <u>do not include</u> individual legal advising sessions) |              |              |                        |                                        |
| Professional development event                                                                                                                |              |              |                        |                                        |
| Social event                                                                                                                                  |              |              |                        |                                        |
| Wellness event                                                                                                                                |              |              |                        |                                        |
| Another type of event                                                                                                                         |              |              |                        |                                        |

Display Q88:  
If response to Q85 *Have you ever been to an office or met with a staff person at ...* is *Yes, I don't know, or Decline to state.*

Q88 Have undocumented student program staff connected you to another person on campus who could provide support, services, or resources?

- No, never
- Yes, 1 other person
- Yes, more than 1 other person
- I don't know



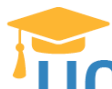

**These final questions are about the COVID-19/coronavirus pandemic and how it has affected you.**

-----  
Q92 To what extent have the following areas been negatively affected by the COVID-19/coronavirus pandemic?

Not at all

A little

A moderate amount

A lot

A great deal

---

Your financial stability

Your family's financial stability

Your mental health

Your physical health

Your academic performance (e.g. grades)

Your attention to your academics

-----  
Q93 Please describe how the COVID-19/coronavirus pandemic has affected you and your family.

---

---

---

---

---

-----  
Q94 Has your or your family member's immigrant origin affected your experience of the COVID-10/coronavirus pandemic? If so, please describe how.

---

---

---

---

---
